# Supplementary material
Source: bioRxiv or medRxiv preprint supplement (https://www.biorxiv.org/highwire/filestream/44969/field_highwire_adjunct_files/0/054122-1.pdf)
Supplement: Supplementary file [file 054122-1.pdf]

1

## SUPPLEMENTAL MATERIAL

2 **Table S1.** Landscape variables compiled. The original spatial resolution is presented

| Variable                   | Source                                                          | Format | Spatial resolution | Temporal coverage | Provider                                                                                                                                                                       |
|----------------------------|-----------------------------------------------------------------|--------|--------------------|-------------------|--------------------------------------------------------------------------------------------------------------------------------------------------------------------------------|
| Climate <sup>1</sup>       | Worldclim                                                       | Grid   | 1 km <sup>2</sup>  | 1950-2000         | Worldclim (Hijmans et al. 2005 [Int. J. Climatology])                                                                                                                          |
| Planted crops <sup>2</sup> | U.S. National Agriculture Statistics Service Cropland Data 2012 | Grid   | 30 m <sup>2</sup>  | 2012              | U.S. Department of Agriculture, National Agriculture Statistics Service, Cropland Data 2012                                                                                    |
| Elevation                  | Global 30 Arc-Second Elevation (GTOPO30)                        | Grid   | 1km <sup>2</sup>   | N/A               | U.S. Geological Survey, GTOPO30                                                                                                                                                |
| Landcover                  | Moderate Resolution Imaging Spectroradiometer (MODIS MCD12Q1)   | Grid   | 500 m <sup>2</sup> | January 2012      | U.S. National Aeronautics and Space Administration, Land Processes Distributed Active Archive Center<br>U.S. Geological Survey, Earth Resources Observation and Science Center |
| Population density         | U.S. Census Bureau                                              | Vector | N/A                | 2010              | U.S. Census Bureau Center for International Earth Science Information Network, Columbia University                                                                             |
| Roads                      | Digital Chart of the World                                      | Vector | N/A                | Unknown           | DIVA-GIS                                                                                                                                                                       |
| Soils <sup>1</sup>         | International Soil Reference and Information Center (ISRIC)     | Grid   | 1 km <sup>2</sup>  | N/A               | ISRIC World Soil Information Database                                                                                                                                          |

3  
4  
5  
6  
7

1. Variables in these datasets were summarized through the use of principal component analyses (PCAs), of which we retained the first component (Table S2).
2. For manageability, this original data were aggregated into broader crops categories following Food and Agriculture Organization (FAO)'s Indicative Crop Classification Version 1.0 (World Programme for the Census of Agriculture 2010)

8 **Table S2.** Loadings of separate principal component analyses (PCA) on 19 climatic and 8  
9 soil variables, respectively. Only the loadings of the first two principal components and  
10 their cumulative variance explained are shown, as these are the synthetic variable used in  
11 all landscape analyses. Loadings above the 75<sup>th</sup> percentile absolute value are highlighted in  
12 bold.

| Climate PCA                          |                   |              | Soil PCA                                |              |              |
|--------------------------------------|-------------------|--------------|-----------------------------------------|--------------|--------------|
| Variable                             | PC1               | PC2          | Variable                                | PC1          | PC2          |
| Annual mean temperature              | <b>0.297</b>      | <b>0.274</b> | Bulk density of the fine earth fraction | 0.016        | <b>0.631</b> |
| Mean diurnal range                   | 0.132             | -0.065       | Cation exchange capacity                | 0.438        | -0.224       |
| Isothermality                        | 0.277             | -0.013       | Clay content                            | 0.263        | -0.140       |
| Temperature seasonality              | -<br><b>0.292</b> | -0.015       | Percent of fraction over 2mm            | -<br>0.095   | -0.646       |
| Maximum temperature of warmest month | 0.156             | 0.231        | Soil organic carbon content             | -<br>0.021   | -0.093       |
| Minimum temperature of coldest month | <b>0.312</b>      | 0.226        | pH                                      | <b>0.521</b> | 0.293        |
| Temperature annual range             | -<br>0.199        | -0.037       | Silt content                            | <b>0.492</b> | -0.069       |
| Mean temperature of wettest quarter  | -<br>0.104        | 0.556        | Sand content                            | -<br>0.464   | 0.123        |
| Mean temperature of driest quarter   | <b>0.411</b>      | -0.160       |                                         |              |              |
| Mean temperature of warmest quarter  | 0.207             | <b>0.299</b> |                                         |              |              |
| Mean temperature of coldest quarter  | <b>0.338</b>      | 0.233        |                                         |              |              |
| Annual precipitation                 | 0.162             | -0.202       |                                         |              |              |
| Precipitation of wettest month       | 0.237             | -0.139       |                                         |              |              |
| Precipitation of driest month        | 0.114             | -0.229       |                                         |              |              |
| Precipitation seasonality            | -<br>0.013        | <b>0.298</b> |                                         |              |              |
| Precipitation of wettest quarter     | 0.221             | -0.112       |                                         |              |              |
| Precipitation of driest quarter      | 0.118             | -0.222       |                                         |              |              |
| Precipitation of                     | 0.112             | 0.094        |                                         |              |              |

|                                 |       |               |  |  |               |
|---------------------------------|-------|---------------|--|--|---------------|
| warmest quarter                 |       |               |  |  |               |
| Precipitation of driest quarter | 0.251 | <b>-0.261</b> |  |  |               |
| <b>Cumulative variance</b>      |       | <b>78.84%</b> |  |  | <b>78.29%</b> |

13

14 **Table S3.** Sampled localities included in the analyses. In addition to geographic coordinates  
15 and sample size for the microsatellite (n SSR) and SNP (n SNP) datasets, expected (He),  
16 observed heterozygosity (Ho), and estimated effective population size (Ne) are provided.  
17 Localities with both SNP and SSR dataset (in bold) have SSR-based estimates on top of SNP-  
18 based estimates.

| Locality  | State | Longitude  | Latitude  | n SSR | n SNP | He             | Ho             | Ne          |
|-----------|-------|------------|-----------|-------|-------|----------------|----------------|-------------|
| 39        | IN    | -85.742262 | 39.988984 | 23    | -     | 0.312          | 0.373          | 20.8        |
| 36        | IN    | -85.503826 | 40.565608 | 28    | -     | 0.297          | 0.316          | 24.1        |
| 35        | IN    | -85.770156 | 39.853945 | 24    | -     | 0.324          | 0.273          | 19.7        |
| 2         | NC    | -77.927484 | 34.595714 | 24    | -     | 0.300          | 0.316          | 21.3        |
| 4         | NC    | -79.125602 | 34.556672 | 22    | -     | 0.294          | 0.269          | 13.4        |
| <b>10</b> | NC    | -78.039309 | 34.983161 | 26    | 10    | 0.339<br>0.252 | 0.292<br>0.242 | 16.1<br>9.5 |
| <b>14</b> | NC    | -77.917121 | 35.424763 | 16    | 10    | 0.269<br>0.306 | 0.248<br>0.277 | 10.9<br>9.5 |
| 19        | NC    | -78.70899  | 34.508193 | 8     | -     | 0.299          | 0.334          | 3.7         |
| 21        | NC    | -77.877314 | 35.369816 | 11    | -     | 0.222          | 0.285          | 9.1         |
| 29        | NC    | -78.738897 | 34.705135 | 19    | -     | 0.301          | 0.282          | 11.4        |
| 40        | OH    | -83.847252 | 41.284684 | 16    | -     | 0.252          | 0.358          | 16          |
| 54        | OH    | -85.548739 | 40.255337 | 10    | -     | 0.305          | 0.319          | 7.5         |
| 38        | OH    | -83.407431 | 39.515447 | 25    | -     | 0.304          | 0.307          | 22.7        |
| 34        | OH    | -83.910189 | 39.44316  | 8     | -     | 0.306          | 0.280          | 6.4         |
| 5         | SC    | -79.909072 | 33.859875 | 14    | -     | 0.222          | 0.265          | 13.1        |
| 8         | SC    | -79.991259 | 34.297195 | 28    | -     | 0.294          | 0.239          | 17          |
| <b>12</b> | SC    | -79.865313 | 34.145812 | 27    | 10    | 0.276<br>0.291 | 0.255<br>0.278 | 18.8<br>9.6 |
| 15        | SC    | -79.073735 | 34.104209 | 33    | -     | 0.297          | 0.253          | 23.3        |
| 17        | SC    | -79.272908 | 34.159155 | 15    | -     | 0.315          | 0.289          | 10          |
| 28        | SC    | -80.377715 | 34.097917 | 18    | -     | 0.303          | 0.281          | 9.3         |
| 1         | TN    | -85.903419 | 35.775237 | -     | 10    | 0.314          | 0.283          | 9.2         |
| 20        | TN    | -85.777871 | 35.830692 | 13    | -     | 0.244          | 0.305          | 10.9        |
| 48        | TN    | -87.35373  | 35.31653  | -     | 10    | 0.245          | 0.240          | 9.5         |
| 23        | TN    | -86.62955  | 35.067905 | 34    | -     | 0.313          | 0.307          | 21.7        |
| <b>26</b> | TN    | -85.951902 | 35.533413 | 12    | 10    | 0.258<br>0.210 | 0.322<br>0.207 | 7.6<br>9.6  |
| 46        | TN    | -86.17985  | 35.536019 | 12    | -     | 0.269          | 0.308          | 9.1         |
| 31        | TN    | -85.846379 | 35.608482 | 16    | -     | 0.358          | 0.384          | 11.1        |
| <b>32</b> | TN    | -86.225509 | 35.099356 | 12    | 10    | 0.239<br>0.236 | 0.261<br>0.209 | 10.6<br>9.4 |
| 30        | TN    | -85.945003 | 35.31105  | 15    | -     | 0.298          | 0.293          | 12.2        |

|           |    |            |           |    |    |       |       |      |
|-----------|----|------------|-----------|----|----|-------|-------|------|
| 44        | VA | -78.797088 | 38.285415 | 14 | -  | 0.341 | 0.400 | 4.8  |
| <b>42</b> | VA | -78.662516 | 38.373523 | 25 | 10 | 0.238 | 0.191 | 13.2 |
|           |    |            |           |    |    | 0.235 | 0.266 | 9.6  |
| 41        | VA | -78.472921 | 38.636343 | 23 | -  | 0.346 | 0.290 | 12.7 |
| 43        | VA | -78.553156 | 36.886448 | 26 | -  | 0.275 | 0.223 | 16.5 |

19

20 **Table S4.** Genetic diversity estimates for localities with both SSR and SNP data. Standard  
21 error is presented in parentheses

| Estimate        | SSRc              | SNPc             |
|-----------------|-------------------|------------------|
| Mean He         | 0.249<br>(0.030)  | 0.255<br>(0.001) |
| Mean Ho         | 0.272<br>(0.022)  | 0.246<br>(0.01)  |
| Mean Ne         | 12.867<br>(1.658) | 9.540<br>(0.09)  |
| F <sub>ST</sub> | 0.103<br>(0.012)  | 0.144<br>(0.005) |

22

23 **Table S5.** Analysis of Molecular Variance (AMOVA) of localities with both SSR and SNP data.  
 24 The contribution of spatial clusters (regions), localities, and individuals is shown. For  
 25 comparison, results from an AMOVA analysis with no region category defined are presented  
 26 in parentheses underneath.

| Effect                  | F-statistic | Variance explained  |                    | F-value          |                  | P-value          |                  |
|-------------------------|-------------|---------------------|--------------------|------------------|------------------|------------------|------------------|
|                         |             | SSRc                | SNPc               | SSRc             | SNPc             | SSRc             | SNPc             |
| Regions                 | $F_{RT}$    | 12.87 %             | 0.00%              | 0.129            | -0.007           | 0.001            | 0.759            |
| Localities              | $F_{SR}$    | 4.86%<br>(16.15%)   | 14.63%<br>(36.08%) | 0.056            | 0.146            | 0.001            | 0.001            |
| Individuals<br>(among)  | $F_{ST}$    | 39.88 %<br>(40.65%) | 23.07%<br>(17.23%) | 0.177<br>(0.161) | 0.140<br>(0.361) | 0.001<br>(0.001) | 0.001<br>(0.001) |
| Individuals<br>(within) | $F_{IS}$    | 42.39%<br>(43.20%)  | 62.30%<br>(46.69%) | 0.485<br>(0.485) | 0.270<br>(0.270) | 0.001<br>(0.001) | 0.001<br>(0.001) |
| Total                   | $F_{IT}$    | 100%<br>(100%)      | 100%<br>(100%)     | 0.576<br>(0.568) | 0.373<br>(0.533) | 0.001<br>(0.001) | 0.001<br>(0.001) |

27

28 **Table S6.** Summary of additional landscape genetic models. To assess the robustness of our  
 29 results to the method employed, in addition to Multiple Regression on Distance Matrices  
 30 (MRDM) we run separate simple and partial dbRDA (distance-based Redundancy Analysis  
 31 Legendre & Anderson, 1999<sup>1</sup>)—the latter uses the geographic distance between populations as a  
 32 covariate to account for the null model of concurrent increase in cumulative resistance with  
 33 geographic distance. In these models we also used effective population size as a predictor to  
 34 assess the effects of local environmental conditions on population differentiation. We opted for  
 35 dbRDA instead of the most commonly used Mantel test given the statistical issues of the latter  
 36 (Guillot & Rousset, 2013<sup>2</sup>; Ruafaste & Rousset, 2001<sup>3</sup>). We run dbRDA using the package vegan  
 37 (Oksanen et al. 2015<sup>4</sup>) in R and assessed significance with 9999 permutations.

38

| Feature                              | dbRDA                   |                  | partial-dbRDA           |                  |
|--------------------------------------|-------------------------|------------------|-------------------------|------------------|
|                                      | SSR                     | SNP              | SSR                     | SNP              |
| <b>Intrinsic variables</b>           |                         |                  |                         |                  |
| Geographic distance                  | 1.234<br>(0.247)        | 2.503<br>(0.206) | —                       | —                |
| Population size (Ne)                 | 1.390<br>(0.311)        | 0.265<br>(0.755) | 1.805<br>(0.117)        | 0.320<br>(0.770) |
| <b>Natural environment variables</b> |                         |                  |                         |                  |
| Climate PC1                          | <b>1.454</b><br>(0.030) | 1.513<br>(0.324) | <b>1.402</b><br>(0.036) | 1.031<br>(0.493) |
| Climate PC2                          | 1.199<br>(0.242)        | 4.957<br>(0.163) | 1.298<br>(0.194)        | 4.702<br>(0.142) |
| Elevation                            | 1.236<br>(0.208)        | 1.369<br>(0.387) | 1.195<br>(0.194)        | 1.256<br>(0.148) |
| Soil PC1                             | <b>1.599</b><br>(0.030) | 3.847<br>(0.163) | 1.315<br>(0.131)        | 2.644<br>(0.255) |
| Soil PC2                             | 0.848<br>(0.614)        | 3.110<br>(0.163) | 1.421<br>(0.131)        | 5.758<br>(0.142) |
| <b>Human-impact variables</b>        |                         |                  |                         |                  |
| Crops                                | 0.819<br>(0.947)        | 2.484<br>(0.206) | 0.836<br>(0.880)        | 1.270<br>(0.432) |
| Landcover                            | 1.272<br>(0.135)        | 3.392<br>(0.194) | 1.249<br>(0.194)        | 4.423<br>(0.318) |
| Population density                   | <b>1.656</b><br>(0.030) | 3.808<br>(0.166) | 1.401*<br>(0.099)       | 2.873<br>(0.191) |



- 39 1. Legendre, P., & Anderson, M. J. (1999). Distance-based redundancy analysis: Testing  
40 multispecies responses in multifactorial ecological experiments. *Ecological*  
41 *Monographs*, 69, 1–24.  
42
- 43 2. Guillot, G., & Rousset, F. (2013). Dismantling the Mantel tests. *Methods in Ecology and*  
44 *Evolution*, 4, 336–344.  
45
- 46 3. Raufaste, N., & Rousset, F. (2001). Are Partial Mantel Tests Adequate? *Evolution*, 55,  
47 1703–1705.  
48
- 49 4. Oksanen, J., Blanchet, F. G., Kindt, R., Legendre, P., Minchin, P. R., O'Hara, R. B., ... Helene,  
50 W. (2015). *vegan: community ecology package*. Retrieved from  
51 <http://cran.r792project.org/package=vegan>

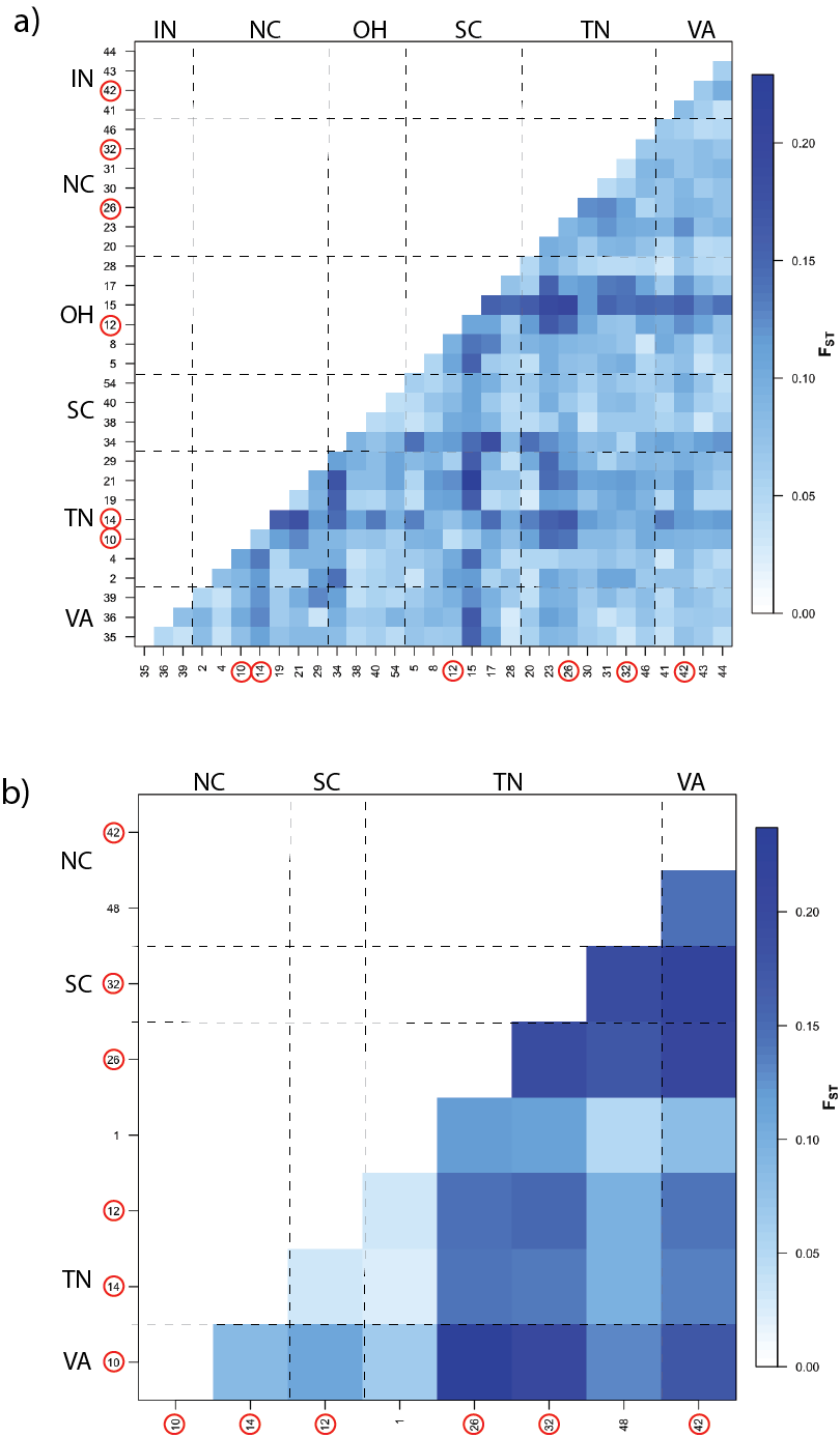

52

53 **Figure S1.** Pairwise  $F_{ST}$  values between sampled localities.  $F_{ST}$  matrices for both SSR (A)  
 54 and SNP (B) datasets are shown. Localities with both SSR and SNP datasets are encircled in  
 55 red. Locality numbers follow Fig. 1.

56

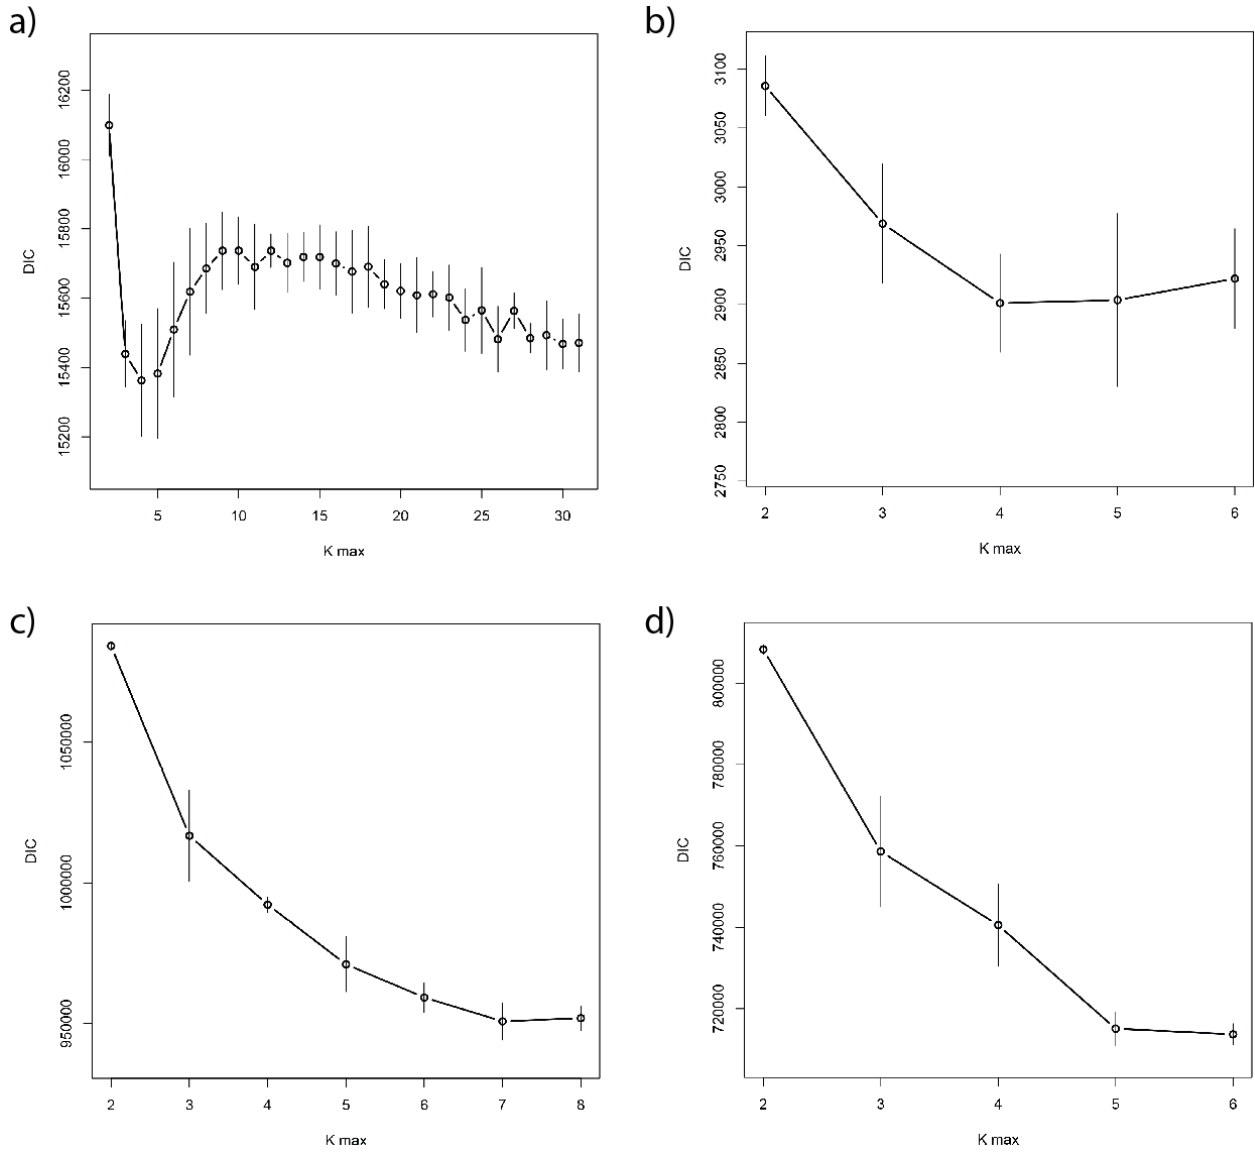

57  
 58 **Figure S2.** K selection for TESS models. DIC plotted as a function of maximum number of  
 59 groups allowed (K) for the SSR (a), SNP (a), SSRc (c), and SNPc (d) datasets. Each dot  
 60 corresponds to the average DIC value computed over 10 replicate runs with its standard  
 61 deviation shown as error bars.

62

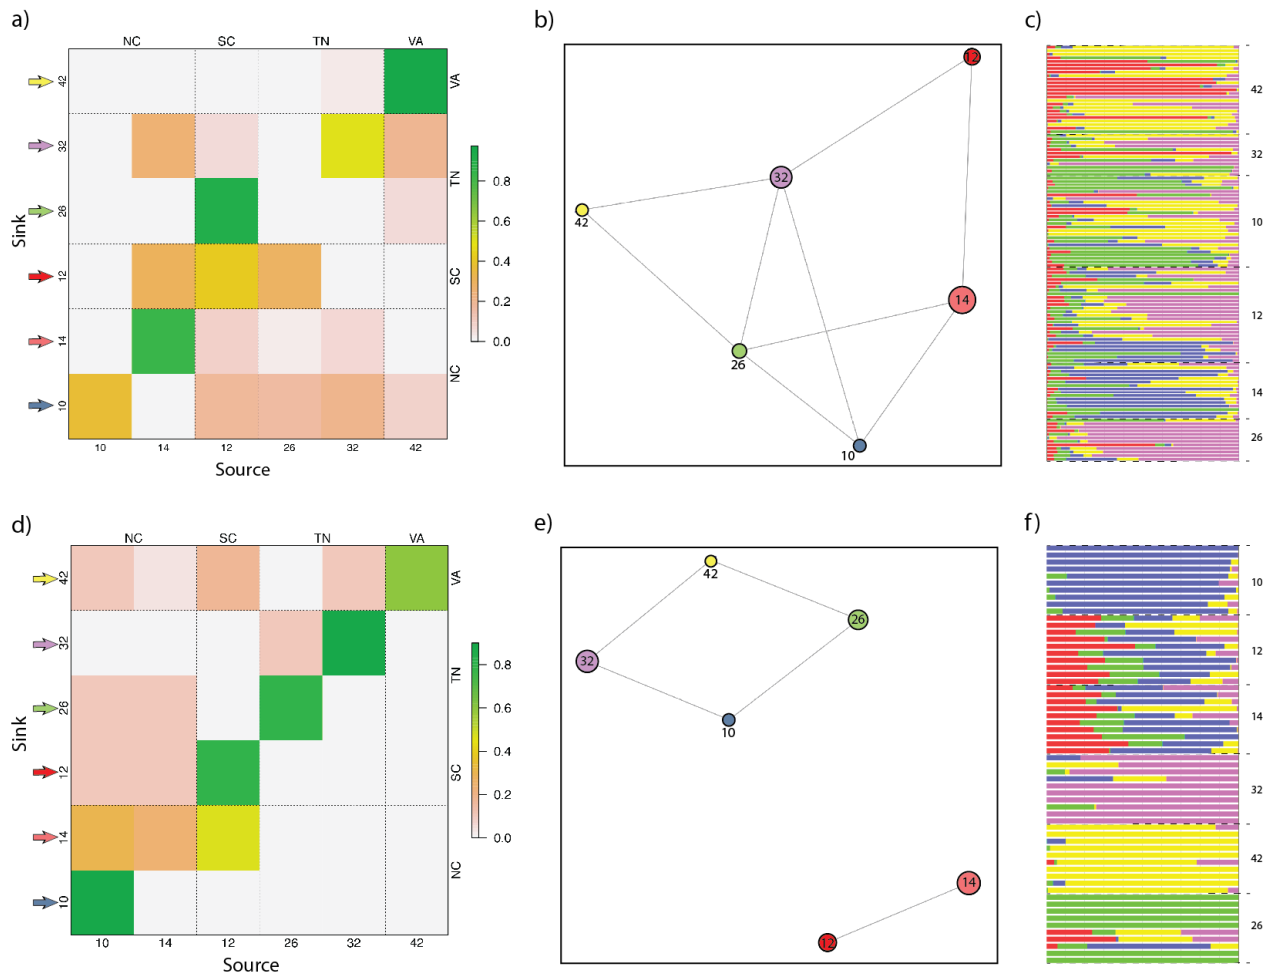

63  
 64 **Figure S3.** Inferred population connectivity for localities with both SSR and SNP data. The  
 65 estimated origin of individuals for each sampled locality (i.e., sink) is depicted according to  
 66 the locality they were inferred to have originated from (source) (a, d). The color of each cell  
 67 in these plots depicts the proportion of individuals in the sink population that were  
 68 estimated to be recent immigrants from each locality along the x-axis. Cells on the minor  
 69 diagonal correspond to the proportion of native individuals. Pruned conditional genetic  
 70 networks (b, e) and posterior estimates of admixture proportion identified by TESS analysis  
 71 (c, f) are also displayed. The top row shows SSR-based results, the bottom shows the SNP-  
 72 based results. Locality numbers follow Fig. 1. Localities shared between SSR and SNP  
 73 datasets are denoted by unique colors in all panels.

74

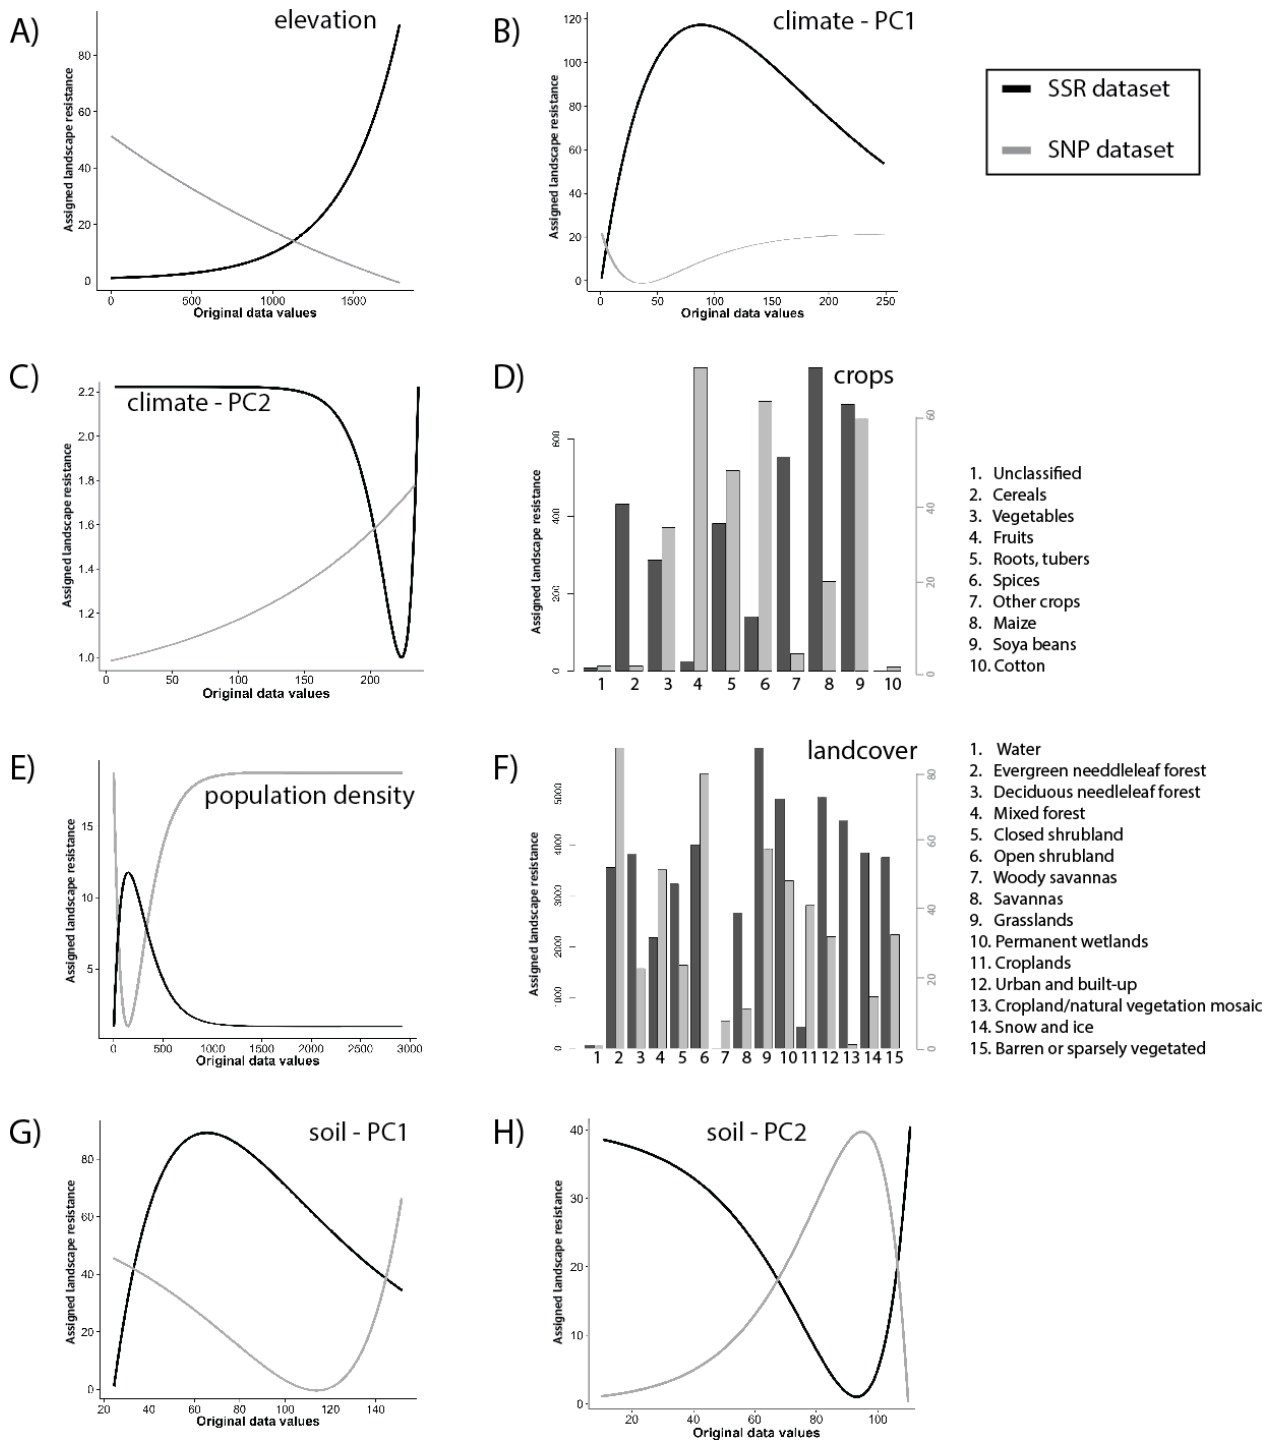

75

76 **Figure S4.** Optimal landscape resistance transformations. Transformations for both SSR

77 and SNP datasets for continuous and categorical variables are shown.

78

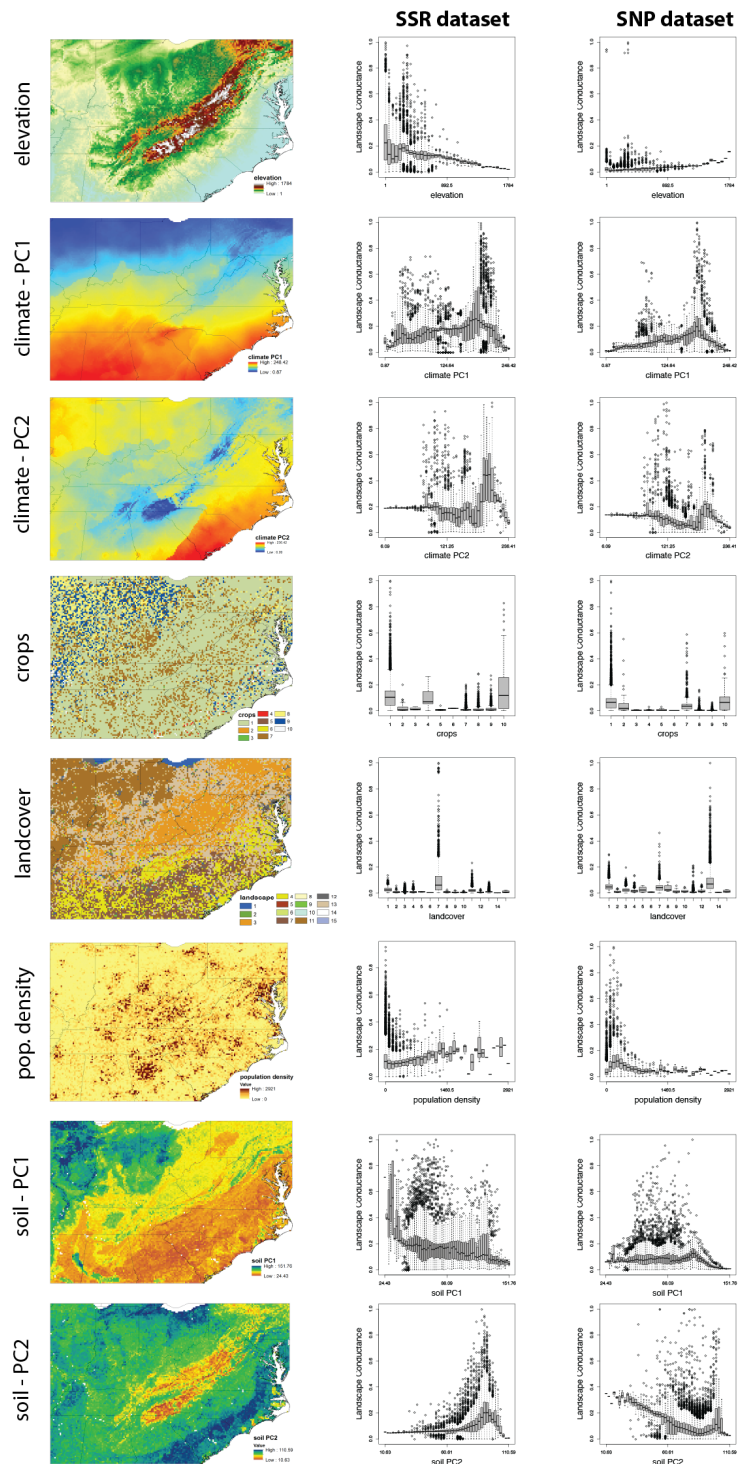

79

80 **Figure S5.** Landscape layers included in the analyses and corresponding landscape  
 81 conductance. The association between each landscape variable (leftmost column) and their  
 82 inferred effect on the ease of migration (i.e., conductivity; right columns) is depicted.
